# Supplementary material
Source: PubMed Central journal article supplement (PMC3629739)
Supplement: cn3002398_si_001.pdf [file cn3002398_si_001.pdf]

## **Supporting Information**

Mechanism of Inhibition of the GluA2 AMPA Receptor Channel  
Opening by Talampanel and its Enantiomer: The stereochemistry of the  
4-Methyl Group on the Diazepine Ring of 2,3-Benzodiazepine  
Derivatives

Congzhou Wang and Li Niu\*

Department of Chemistry and Center for Neuroscience Research, University at  
Albany, Albany, NY 12222, USA

## 1. Equations

The equations used to calculate the inhibition constants for BDZ-*d* or BDZ-*e* are described below. It should be noted that all of the equations are generally labeled by English alphabet; however, we specifically single out those that are used directly for calculating inhibition constants by labeling them with numerical numbers here and in the text. First, we present the equations derived from a channel-opening mechanism in the absence of any inhibitor.

**(i) A General Mechanism of Channel Opening for AMPA Receptors and Equations.** A general mechanism of channel opening for an AMPA receptor is shown below.

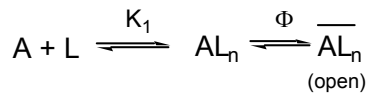

$A$  represents the active, unliganded form of the receptor,  $AL_n$  are the closed-channel form of the receptor, and  $\overline{AL_n}$  represents the open-channel form.  $K_1$  is the intrinsic dissociation constant of glutamate;  $\Phi$ , the  $AL / \overline{AL_n}$ ;  $I_A$ , the current amplitude corresponding to a certain concentration of ligand or in this case, glutamate;  $I_m$ , the current per mole of receptor sites; and  $R_m$ , the moles of receptor sites.

$$I_A = I_M R_M \frac{L^n}{L^n + \Phi(L + K_1)^n} = I_M R_M \left(\overline{AL_n}\right)_o \quad \text{eq a}$$

The number of glutamate molecules to bind to the receptor and to open its channel,  $n$ , can be from 1 to 4, assuming that a receptor is a tetrameric complex and each subunit has one glutamate binding site. However, our study of the channel-opening process of AMPA receptors supports the assumption that a minimum of binding of two glutamate molecules per receptor complex is sufficient to open an AMPA receptor channel.<sup>1-5</sup> For simplicity and without contrary evidence, it is further assumed that glutamate binds with equal affinity or  $K_1$  at all binding steps.

Using  $n = 2$ , we can then define that  $\left(\overline{AL_n}\right)_o$  or  $\left(\overline{AL_2}\right)_o$  represents the fraction of the open-channel form, and is proportional to the current amplitude, as shown in eq a. Furthermore,  $\left(\overline{AL_2}\right)_o$  can be further expressed as a function of the fraction of all receptor forms.

$$\left(\overline{AL_2}\right)_o = \frac{\overline{AL_2}}{A + AL + AL_2 + \overline{AL_2}} = \frac{L^2}{L^2(1 + \Phi) + 2K_1L\Phi + K_1^2\Phi} \quad \text{eq b}$$

The channel-opening kinetic process, observed in a laser-pulse photolysis measurement, followed a single exponential rate expression, in eq c, for ~95% of the rise time, as shown in Figure 4a in the text.

$$I_t = I_{\max} (1 - e^{-k_{\text{obs}}t}) \quad \text{eq c}$$

In eq c,  $I_t$  represents the current amplitude at time  $t$  and  $I_{\max}$  the maximum current amplitude. From eq c, an observed rate constant,  $k_{\text{obs}}$ , can be calculated. By using the scheme for channel opening described above, we can express  $k_{\text{obs}}$  in eq d.

$$k_{\text{obs}} = k_{\text{cl}} + k_{\text{op}} \left( \frac{L}{L + K_1} \right)^2 \quad \text{eq d}$$

In deriving eq d, it is assumed that the ligand-binding rate is fast relative to the channel-opening rate and  $n = 2$ .<sup>1-5</sup> Here  $k_{\text{op}}$  and  $k_{\text{cl}}$  are the rate constant of channel opening and closing, and  $k_{\text{cl}}/k_{\text{op}} = \Phi$  as in the general mechanism of channel opening.

**(ii) Use of whole-cell current amplitude to determine an inhibition constant.** The mechanism of inhibition of AMPA receptors or precisely the GluA2Q<sub>flip</sub> receptor channel by BDZ- $d$  as in this study is shown in Figure 5 in the text.

From this mechanism of inhibition, we can derive eq 1, shown below, and use it to determine an inhibition constant from the effect of BDZ- $d$  on the amplitude of whole-cell current:

$$\frac{A}{A_I} = 1 + I \frac{(\overline{AL_2})_0}{K_I} \quad \text{eq 1}$$

$A$  and  $A_I$  are the whole-cell current amplitude in the absence and presence of an inhibitor;  $I$  represents inhibitor.  $(\overline{AL_2})_0$  is expressed in eq b above. More importantly, the magnitude of  $(\overline{AL_2})_0$  depends on glutamate concentration. As explained in the text, for GluA2Q<sub>flip</sub>, we chose 100  $\mu\text{M}$  and 3  $\text{mM}$ , which correspond to  $\sim 4\%$  and  $\sim 95\%$  of the fraction of the open-channel form in a receptor population, respectively.<sup>2</sup> Consequently, the inhibition constant of BDZ- $d$ , for example, for both the closed-channel and the open-channel state were determined (in Figure 2).

**(iii) Use of the Rate Constant of the Channel Opening to Determine an Inhibition Constant and to Characterize the Mechanism of Inhibition.** When the channel-opening rate was inhibited noncompetitively (as in Figure 5), the expression for the observed first-order rate constant or  $k_{\text{obs}}$  was given by eq e, where only one rate was observable (this rate is assigned to the first step, corresponding to the formation of the initial inhibitor-receptor intermediate). As such, the effect of an inhibitor on the channel-closing rate constant,  $k_{\text{cl}}$ , was determined by using eq 2, where the inhibition constant associated with the open-channel state ( $\overline{K_I}$ ) could be further estimated (at low ligand concentration: see text for further explanation). At a higher ligand concentration, the difference between  $k_{\text{obs}}$  and  $k_{\text{cl}}$  was determined, giving rise to the effect of an inhibitor on  $k_{\text{op}}$ , as shown in eq 3.

$$k_{\text{obs}} = k_{\text{cl}} \left( \frac{\overline{K_I}}{\overline{K_I} + I} \right) + k_{\text{op}} \left( \frac{L}{L + K_1} \right)^2 \left( \frac{K_I}{K_I + I} \right) \quad \text{eq e}$$

$$\frac{1}{k_{obs}} = \frac{1}{k_{cl}} + \frac{1}{k_{cl}} \frac{I}{\bar{K}_I} \quad \text{eq 2}$$

$$(k_{obs} - k'_{cl})^{-1} = [k_{op}L/(L + K_I)^2]^{-1}(1 + I/K_I) \quad \text{eq 3}$$

Therefore, as a noncompetitive inhibitor, BDZ-*d* is expected to inhibit both  $k_{cl}$  and  $k_{op}$ . Furthermore, at the low and high glutamate concentrations, the inhibition constants pertinent to the closed-channel and open-channel states can be further measured (see Figures 4b and 4c) by the use of eqs 2 and 3. If BDZ-*d* is a competitive inhibitor, it only inhibits  $k_{op}$  but not  $k_{cl}$ . Conversely, if BDZ-*d* is an uncompetitive inhibitor or open-channel blocker, it will inhibit only  $k_{cl}$  but not  $k_{op}$ .

**(iv) Use of a Double-Inhibitor Experiment to Determine Whether the Two Inhibitors Bind to the Same Site or Two Different Sites.** To determine whether BDZ-*d* and GYKI 52466 bound to the same site or two different sites (i.e., two mutually exclusive sites), we used the two inhibitors simultaneously to inhibit the GluA2Q<sub>flip</sub> channel activity. Specifically, the amplitude was used, similar to eq 1, to plot  $A/A_{I,P}$  vs. one inhibitor concentration. Here, one inhibitor was represented as  $I$  in molar concentration while the other was  $P$ . Based on the assumption that one inhibitor bound per receptor and binding of inhibitor excluded the binding of the other (i.e., one-site model or  $A_I$  or  $A_P$  are allowed but not  $A_{I,P}$ ), the ratio of the current amplitude was given in eq 4.

$$\text{One-Site Model: } \frac{A}{A_{I,P}} = \left(1 + \frac{P}{K_P}\right) + \frac{I}{K_I} \quad \text{eq 4}$$

On the other hand, for a two-site model in which there are two sites for  $I$  and  $P$  separately (i.e., both  $A_I$  and  $A_P$  and  $A_{I,P}$  are all allowed), the ratio of the current amplitude is therefore given in eq 5.

$$\text{Two-Site Model: } \frac{A}{A_{I,P}} = \left(1 + \frac{P}{K_P}\right) + \left(1 + \frac{P}{K_P}\right) \frac{I}{K_I} \quad \text{eq 5}$$

The data are shown in Figure 6. The dashed-line is the simulated inhibition ratios assuming the two inhibitors bound to two separate sites on GluA2Q<sub>flip</sub>. To simplify the term, we continued to use  $A/A_I$  in Figure 6 to express the ratio of whole-cell current amplitude in the absence and presence, in this case, two inhibitors.

## References

1. Li, G., and Niu, L. (2004) How fast does the GluR1Qflip channel open?, *J Biol Chem* 279, 3990-3997. Epub 2003 Nov 3910.
2. Li, G., Pei, W., and Niu, L. (2003) Channel-opening kinetics of GluR2Q(flip) AMPA receptor: a laser-pulse photolysis study, *Biochemistry* 42, 12358-12366.
3. Pei, W., Huang, Z., and Niu, L. (2007) GluR3 Flip and Flop: Differences in Channel-Opening Kinetics, *Biochemistry In press*.
4. Li, G., Sheng, Z., Huang, Z., and Niu, L. (2005) Kinetic mechanism of channel opening of the GluRDflip AMPA receptor, *Biochemistry* 44, 5835-5841.
5. Pei, W., Ritz, M., McCarthy, M., Huang, Z., and Niu, L. (2007) Receptor occupancy and channel-opening kinetics: a study of GLUR1 L497Y AMPA receptor, *J Biol Chem* 282, 22731-22736.

## 2. Supporting Information Figures

**Figure 1.**

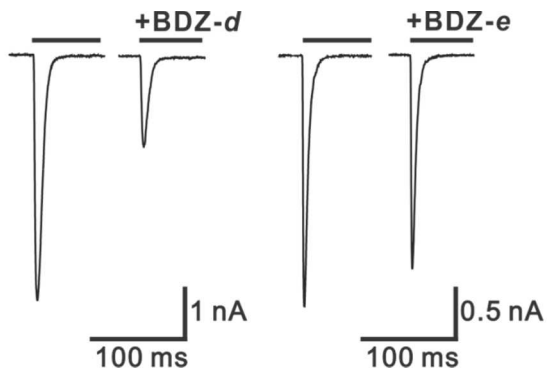

**Figure 1.** Representative whole-cell currents mediated by the open-channel state of GluA2Q<sub>flop</sub> receptors expressed in HEK-293S cells in the absence and presence of BDZ-*d* or BDZ-*e* obtained using solution flow measurement. The pair of the two traces on the left represent the currents in the absence (left) and presence (right) of 40  $\mu$ M BDZ-*d*. The inhibition ratio ( $A/A_1$ ) was determined to be  $\sim 3.3$ . The pair on the right side were the control or in the absence (left) and presence (right) of 40  $\mu$ M BDZ-*e*. The inhibition ratio ( $A/A_1$ ) was determined to be  $\sim 1.2$ . The bar above each current trace represents a pulse of 3 mM glutamate for evoking the whole-cell current. The whole-cell recording was carried out at -60 mV, pH 7.4, and 22  $^{\circ}$ C.

Figure 2.

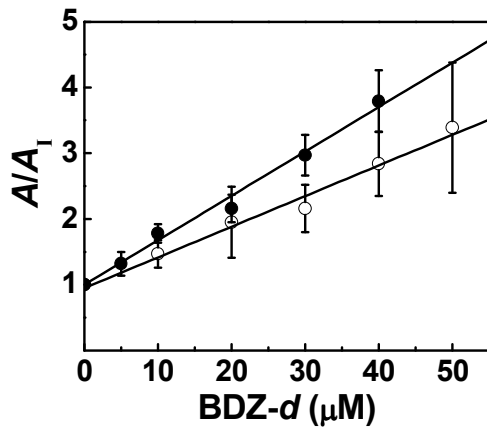

**Figure 2.** Effect of BDZ-*d* on the whole-cell current amplitude of GluA2Q<sub>flop</sub> receptors obtained from the flow measurement. A  $K_I$  of  $15 \pm 1 \mu\text{M}$  was determined the closed-channel state (100  $\mu\text{M}$  glutamate, ●); a  $\overline{K_I}$  of  $22 \pm 1 \mu\text{M}$  was obtained for the open-channel state (3 mM glutamate, ○).

**Figure 3.**

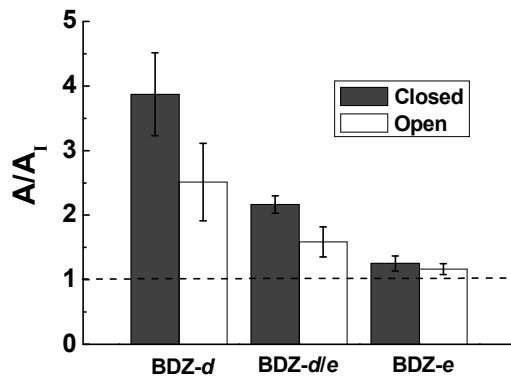

**Figure 3.** The inhibition ratios ( $A/A_1$ ) of the mixture containing 20  $\mu\text{M}$  BDZ-*d* and 20  $\mu\text{M}$  BDZ-*e* were determined for both the closed-channel (100  $\mu\text{M}$  glutamate, filled column) and open-channel (3 mM glutamate, open column) states of the homomeric GluA2Q<sub>flip</sub> receptor. These ratios are compared with those measured from 40  $\mu\text{M}$  BDZ-*d* and 40  $\mu\text{M}$  BDZ-*e*.
